# Supplementary material for: Mixed Methods Assessment of ChatGPT Accuracy and Reliability in Healthcare Queries by Medical Residents
Source: Research Square preprint supplement (doi:10.21203/rs.3.rs-7388040/v1), 2025-10-27
Supplement: Supplementary file 1 [file 12a701a4b8e48f5e3e43c3fb.docx]

**In-Depth Interview Guide**

**SECTION A: Background**

1. Can you briefly describe your medical specialty and experience in clinical practice?
2. Have you used ChatGPT or similar AI tools in your practice, teaching, or research?

If yes: In what ways have you used it?

**SECTION B: Perceived Advantages of ChatGPT**

1. Based on your experience or observation, what are the main benefits of using ChatGPT in medical practice?

Probe if needed: Has it helped with diagnosis, treatment suggestions, patient education, or medical training?

1. Do you think ChatGPT can assist in improving the quality or efficiency of healthcare delivery?

Prompt: Does it help in time-consuming tasks, or repetitive work?

1. What role do you think ChatGPT plays in medical education or student learning?

**SECTION C: Limitations and Performance Concerns**

1. Have you encountered any limitations or issues when using ChatGPT?

Prompt: Inaccurate or unclear responses, generic suggestions, context-mismatch, or lack of clinical specificity

1. How do you evaluate the clinical accuracy and reliability of ChatGPT, especially in complex or nuanced cases?
2. Did you observe performance variation depending on the type of medical question asked (e.g., binary vs descriptive)?

**SECTION D: Ethical and Medico-Legal Considerations**

1. Do you have concerns about medico-legal issues when using AI tools like ChatGPT in clinical decision-making?

Prompt: Responsibility in case of error, documentation, informed consent

1. In your opinion, what are the risks of using AI-generated responses in direct patient care without supervision?

**SECTION E: Dependency and Future Outlook**

1. Do you believe younger doctors or students may become over-reliant on AI tools like ChatGPT?

If yes: What do you think are the possible consequences on clinical judgment?

1. Given the current capabilities and limitations of ChatGPT, do you believe AI can **replace** doctors in the future?

Why or why not?

Prompt: Can it replace all roles or only assist in certain tasks?]

1. How do you envision the role of doctors evolving alongside AI in healthcare?
2. What do you think needs to be improved or regulated before AI can be safely integrated into routine medical practice?

**SECTION F: Final Thoughts**

1. Is there anything else you'd like to add regarding ChatGPT’s use in clinical settings or its future potential?
